# Supplementary material for: The features of AECOPD with carbon dioxide retention
Source: BMC Pulm Med. 2018 Jul 31;18:124. doi: 10.1186/s12890-018-0691-8 (PMC6066936; doi:10.1186/s12890-018-0691-8)
Supplement: Supplementary file 1 — Table S1. Comparison of wall areas between the carbon dioxide retention and non-carbon dioxide retention COPD groups. (XLSX 10 kb) [file 12890_2018_691_MOESM1_ESM.xlsx]

## Sheet: Sheet1
Table S1.Comparison of Wall areas between between the carbon dioxide retention and non-carbon dioxide retention COPD
Wall areas	n	carbon dioxide retention	n	non-carbon dioxide retention	p value
%WARUL4	86	0.6106(0.5775-0.6538)	144	0.6160(0.5689-0.6516)	0.974
%WARUL5	83	0.7274±0.055	136	0.7208±0.059	0.409
%WARUL6	73	0.7864±0.055	126	0.7847±0.049	0.822
%WARUL7	60	0.8026±0.053	101	0.8067±0.056	0.645
%WARML4	77	0.5456（0.5099-0.5816）	132	0.5561（0.4966-0.6054）	0.647
%WARML5	70	0.6659（0.6362-0.7409）	121	0.6749（0.6307-0.7084）	0.647
%WARML6	51	0.7421±0.063	98	0.7367±0.056	0.59
%WARML7	37	0.7537±0.081	64	0.7627±0.056	0.51
%WARLL4	83	0.4407（0.4067-0.4718）	141	0.4480（0.4136-0.4895）	0.152
%WARLL5	81	0.5641±0.066	138	0.5638±0.067	0.972
%WARLL6	81	0.6516（0.6069-0.6825）	132	0.6495（0.6053-0.6819）	0.695
%WARLL7	76	0.6571±0.074	125	0.6543±0.067	0.778
%WARLL8	69	0.6678±0.068	119	0.6676±0.064	0.989
%WARLL9	62	0.6811±0.084	104	0.7015±0.069	0.092
%WALUL4	85	0.5783±0.071	142	0.5874±0.061	0.313
%WALUL5	83	0.6773（0.6481-0.7122）	137	0.6754（0.6384-0.7029）	0.412
%WALUL6	80	0.7449±0.059	131	0.7447±0.052	0.986
%WALUL7	67	0.7902±0.053	115	0.7806±0.055	0.251
%WALLL4	81	0.5417±0.066	138	0.5479±0.068	0.508
%WALLL5	76	0.6149（0.5787-0.6548）	136	0.6158（0.5716-0.6545）	0.762
%WALLL6	72	0.6547±0.068	124	0.6634±0.063	0.365
%WALLL7	67	0.6925±0.065	106	0.6972±0.064	0.636
%WALLL8	50	0.7184±0.065	88	0.7125±0.058	0.588
%WALLL9	33	0.7141±0.066	62	0.7224±0.069	0.573
Abbreviation:%WA:the percentage of the wall area;The %WA of different generations in each lobe were represented as %WARUL4-7, %WARML4-7, %WARLL4-9, %WALUL4-7, and %WALLL4-9;
